# Supplementary material
Source: PubMed Central journal article supplement (PMC4142832)
Supplement: Supp_Figure1.pdf [file Supp_Figure1.pdf]

## Supplementary Data

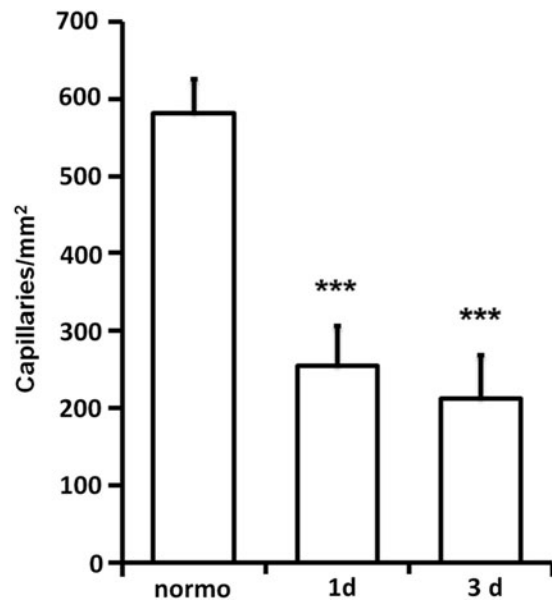

SUPPLEMENTARY FIG. S1. Time course of capillary density in CD1 mice. The bar graph represents quantification of capillaries/mm<sup>2</sup> in normoperfused (normo) and ischemic CD1 mice at 1 and 3 days. Differences between ischemic and normoperfused muscles are statistically significant (\*\* $p < 0.0001$ ;  $n = 7-8$ ).
