# Supplementary material
Source: PubMed Central journal article supplement (PMC4142832)
Supplement: Supp_Figure2.pdf [file Supp_Figure2.pdf]

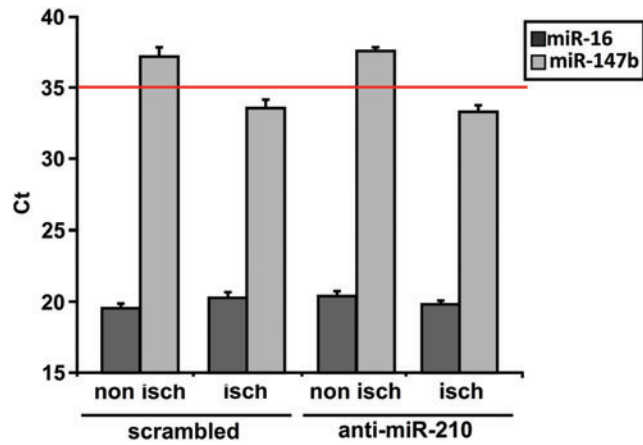

**SUPPLEMENTARY FIG. S2. miR-147b is induced upon ischemia.** The levels of miR-147b were measured in the gastrocnemius muscle by qPCR, 3 days after ischemia induction ( $n=8$ ). In both SCR and anti-miR-210-treated mice, miR-147b levels were undetectable in non ischemic muscles ( $Ct > 35$ ). In ischemic muscles, miR-147b was detectable in both SCR and anti-miR-210-treated mice ( $Ct < 35$ ). Ct levels of a control miRNA (miR-16) were similar in all groups. Ct-35 threshold is indicated. qPCR, quantitative real-time PCR; SCR, scrambled.
