# Supplementary material
Source: PubMed Central journal article supplement (PMC4142832)
Supplement: Supp_Figure3.pdf [file Supp_Figure3.pdf]

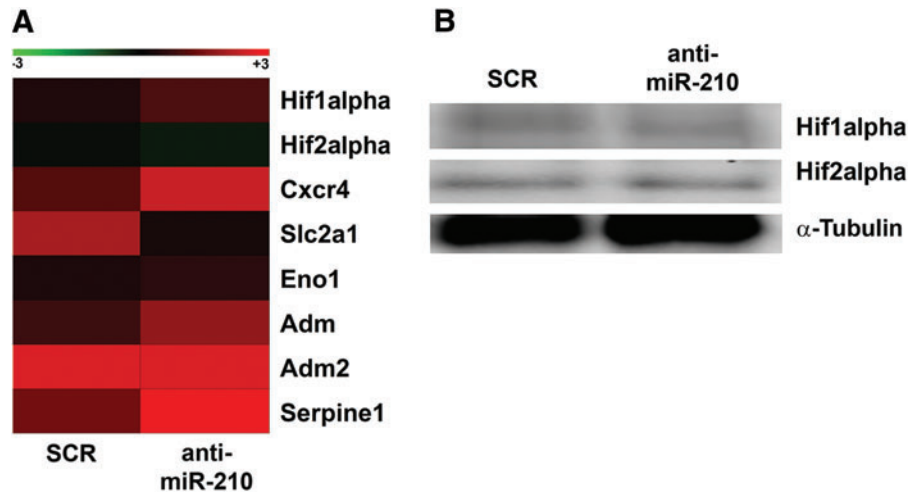

**SUPPLEMENTARY FIG. S3. miR-210 blockade does not affect Hif activation upon ischemia.** (A) The levels of the indicated HIF1alpha species and targets were measured in the gastrocnemius muscle by qPCR, 3 days after ischemia induction ( $n=8$ ). The heat map shows average expression levels in a base 2 logarithmic scale, where red color indicates upregulation and green color downregulation. HIF1alpha targets were similarly induced in anti-miR-210 and SCR-treated ischemic muscles compared to controlateral non ischemic muscles. (B) Representative western blotting analysis of HIF1alpha and HIF2alpha and  $\alpha$ -tubulin (loading control) protein levels in ischemic gastrocnemius muscles ( $n=3$ ). Both HIF1alpha and HIF2alpha display similar levels in anti-miR-210 and SCR-treated mice. HIF1alpha, hypoxia-inducible factor 1alpha.
