# Supplementary material
Source: PubMed Central journal article supplement (PMC4142832)
Supplement: Supp_Figure4.pdf [file Supp_Figure4.pdf]

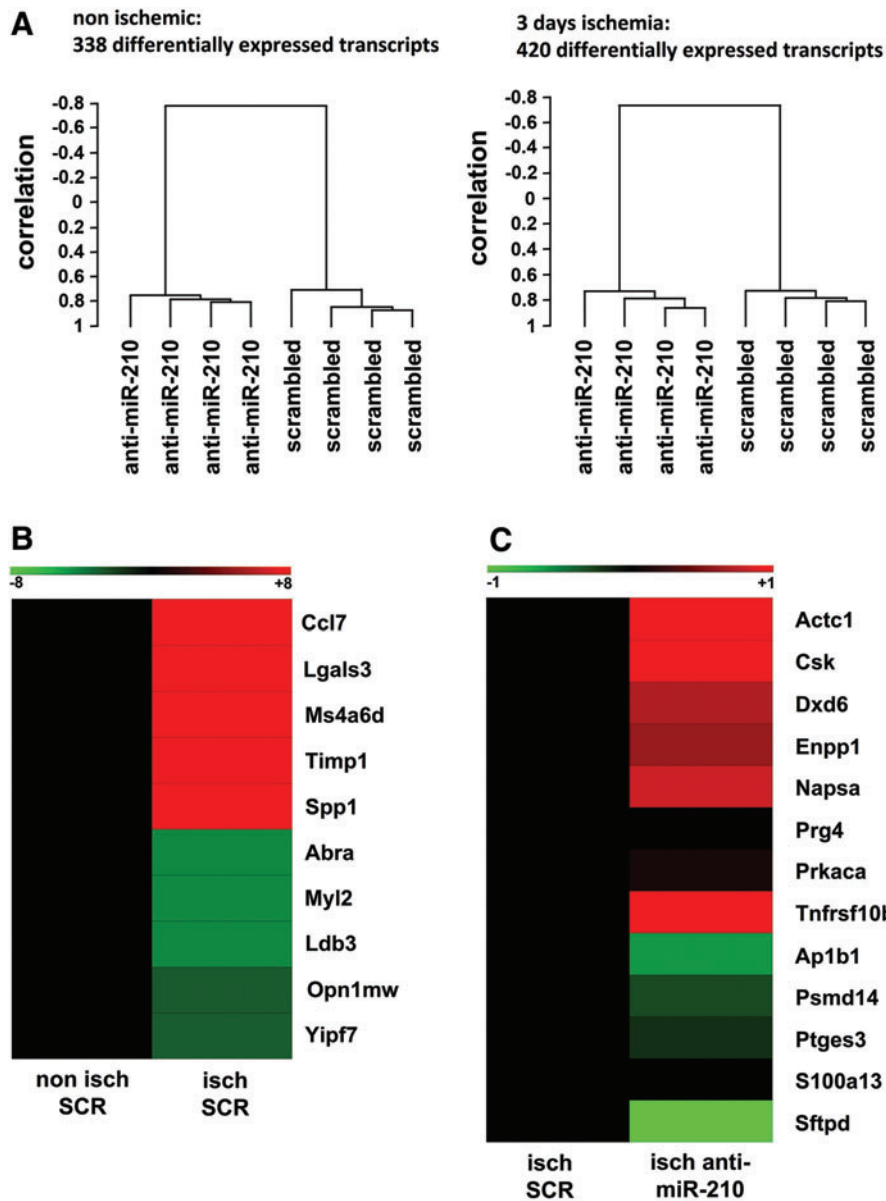

**SUPPLEMENTARY FIG. S4. Hierarchical clustering and qPCR validation of ischemic gastrocnemius gene expression profiles.** (A) Hierarchical clustering obtained using centered correlation and average linkage of nonischemic (*left panel*) and ischemic (*right panel*) samples derived from SCR and anti-miR-210-treated muscles. (B) Transcripts modulated upon ischemia ( $n=4$ ) and (C) transcripts differentially expressed in anti-miR-210 and SCR-treated ischemic muscles ( $n=4-6$ ). The levels of the indicated transcripts were measured in the gastrocnemius muscle by qPCR, 3 days after ischemia induction. The heat map shows average expression levels in a base 2 logarithmic scale, where red color indicates upregulation and green color downregulation.
