# Supplementary material
Source: PubMed Central journal article supplement (PMC4142832)
Supplement: Supp_Figure5.pdf [file Supp_Figure5.pdf]

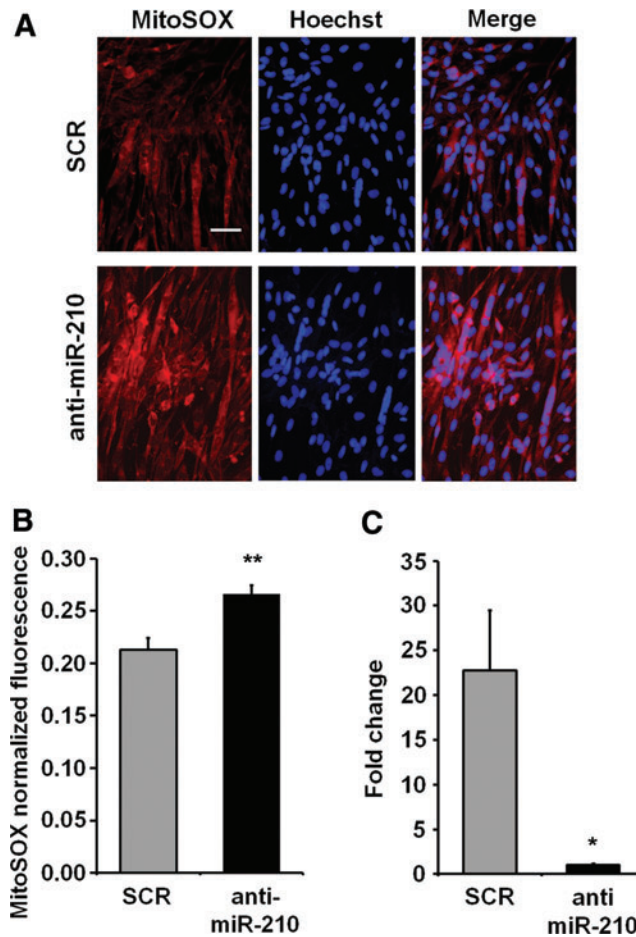

**SUPPLEMENTARY FIG. S5. Increased mitochondrial oxidant levels in hypoxic myotubes upon miR-210 blocking.** C2C12 mouse myoblasts were transfected with SCR or anti-miR-210. The next day, cells were switched to differentiation medium and allowed to differentiate for 48 h, followed by incubation in 1% O<sub>2</sub> hypoxic conditions for 24 h. Then, myotubes were stained with MitoSOX and Hoechst 33342 dyes, and fluorescence was revealed by fluorescence microscopy. **(A)** Representative pictures display MitoSOX and Hoechst 33342 fluorescences, either separate or merged. Calibration bar=50  $\mu$ m. **(B)** The bar graph indicates MitoSOX fluorescence intensity normalized for the number of Hoechst 33342-positive nuclei (\*\* $p < 0.002$ ;  $n = 6$ ) MitoSOX-associated fluorescence was increased when miR-210 was inhibited. **(C)** The bar graph shows miR-210 levels in C2C12 cells transfected with anti-miR-210 or SCR. miR-210 levels were efficiently decreased by anti-miR-210 ( $n = 6$ ; \* $p < 0.03$ ).
