# Supplementary material
Source: PubMed Central journal article supplement (PMC4142832)
Supplement: Supp_Figure6.pdf [file Supp_Figure6.pdf]

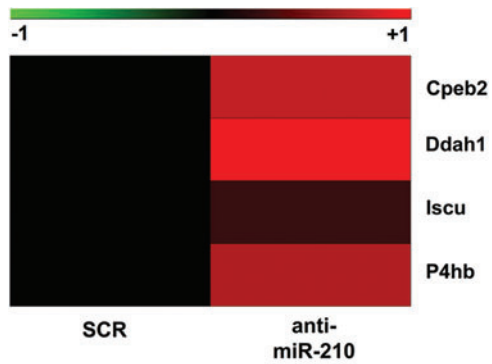

**SUPPLEMENTARY FIG. S6. miR-210 targets de-repression in normoperfused muscles upon miR-210 inhibition.** The level of the indicated miR-210 targets was measured in nonischemic gastrocnemius muscles by qPCR, 2 days after treatment with either anti-miR-210 or SCR ( $n=4$ ). The heat map shows average expression levels in a base 2 logarithmic scale, where green and red colors indicate down- or up-regulation, respectively. miR-210 targets were de-repressed in anti-miR-210 compared to SCR-treated muscles.
